# Supplementary material for: Living shorelines achieve functional equivalence to natural fringe marshes across multiple ecological metrics
Source: PeerJ journal article supplement (doi:10.7717/peerj.11815), 2021-08-13
Supplement: SupplementalFigures.pdf [file SupplementalFigures.pdf]

# Supplemental Figures

Robert Isdell

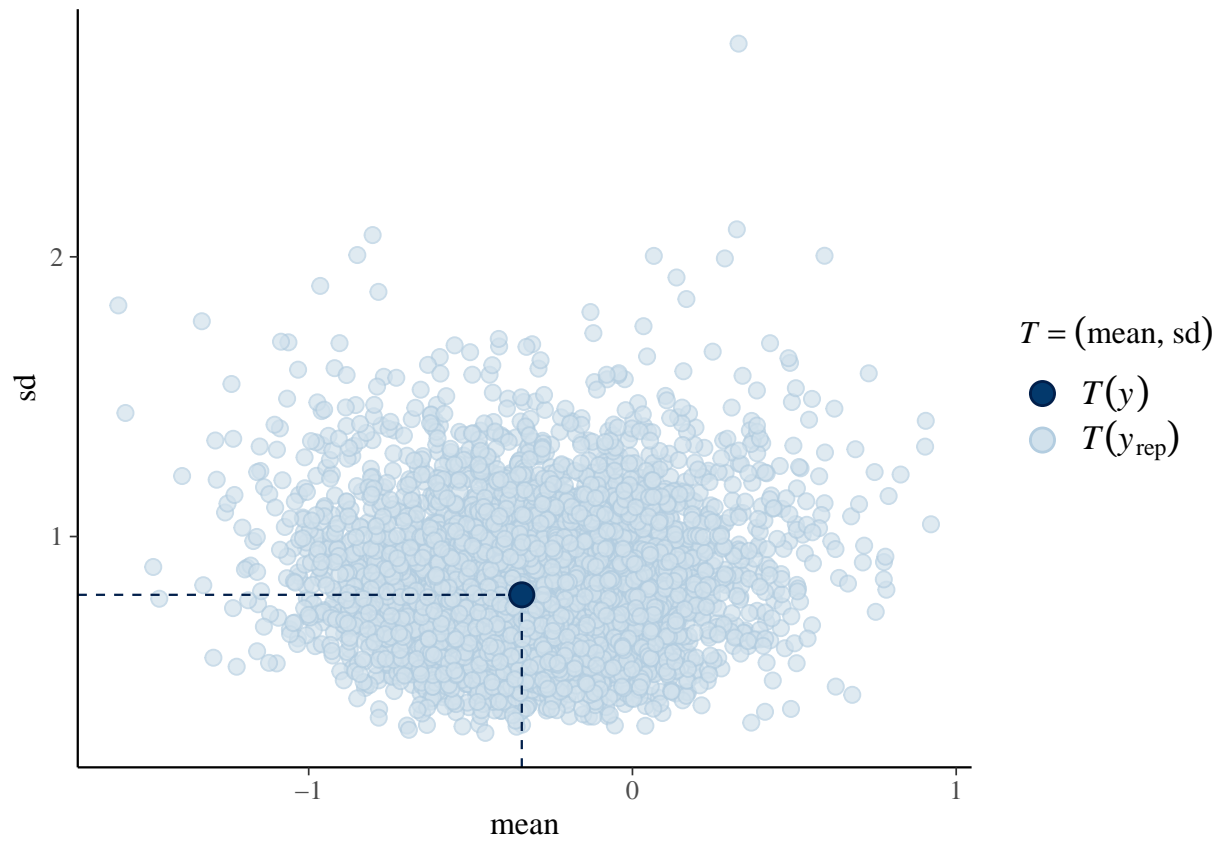

**Figure S1: Posterior predictive check that the model adequately captures the parameters of the data.** This figure is for the model that uses only the mussels from both the low marsh and the sill.

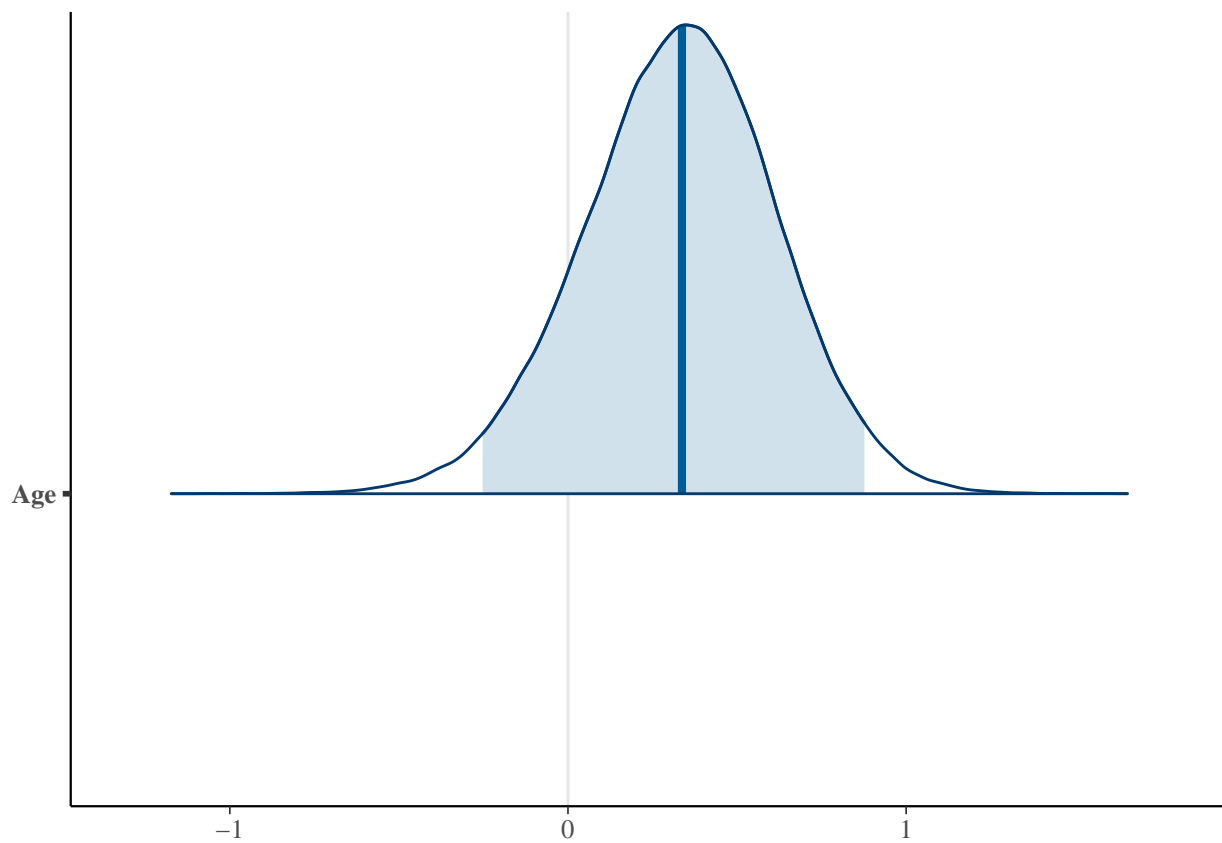

**Figure S2:** Posterior distribution of the living shoreline age coefficient from the model including mussels in the low marsh and on the sill.

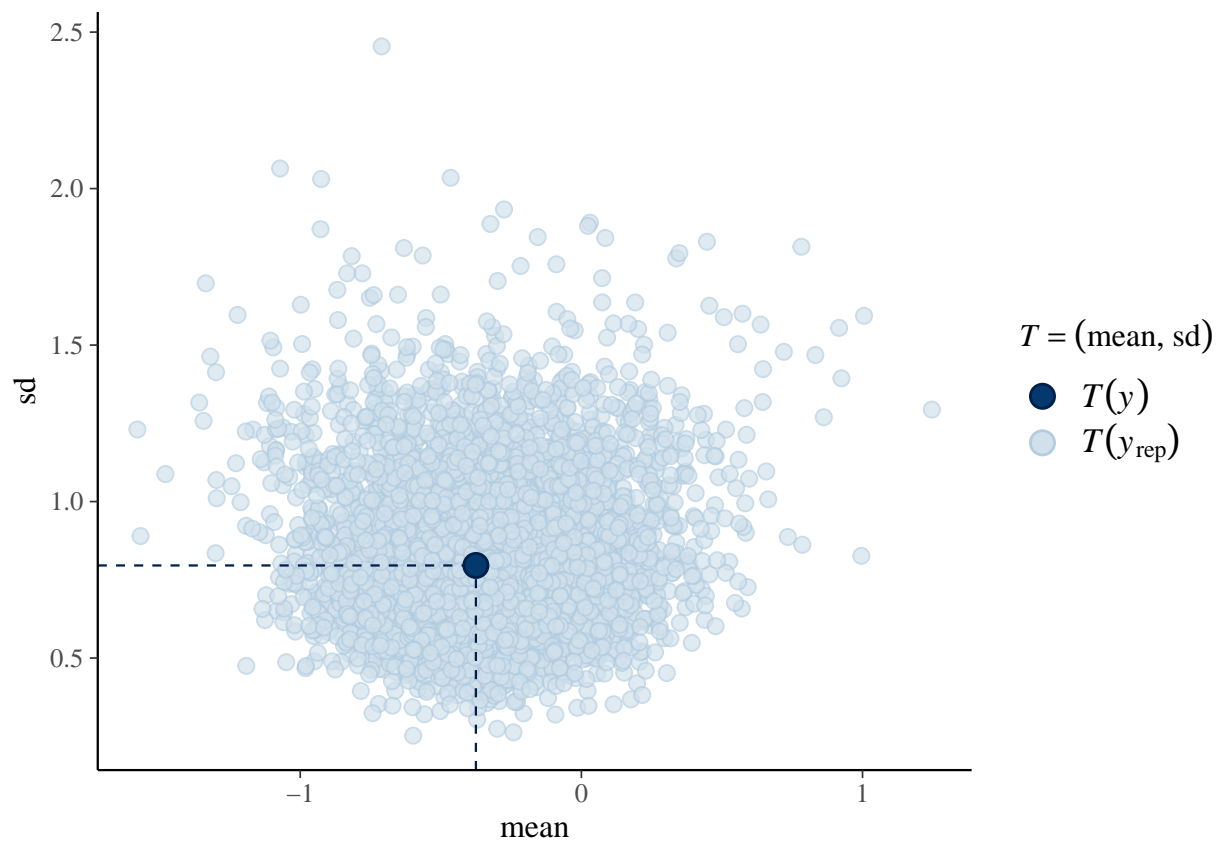

**Figure S3: Posterior predictive check that the model adequately captures the parameters of the data.** This figure is for the model that uses only the mussels from the low marsh and not the sill.

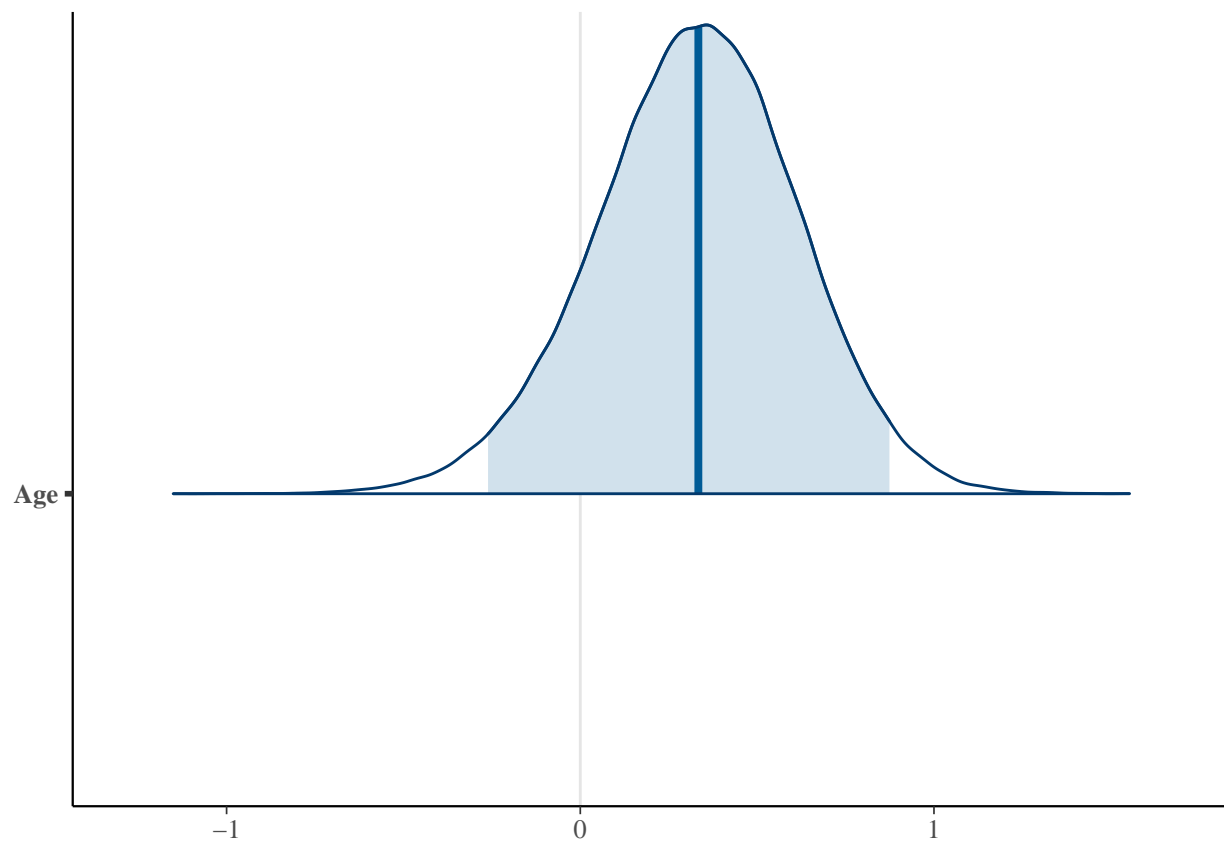

**Figure S4: Posterior distribution of the living shoreline age coefficient from the model including mussels only in the low marsh.**

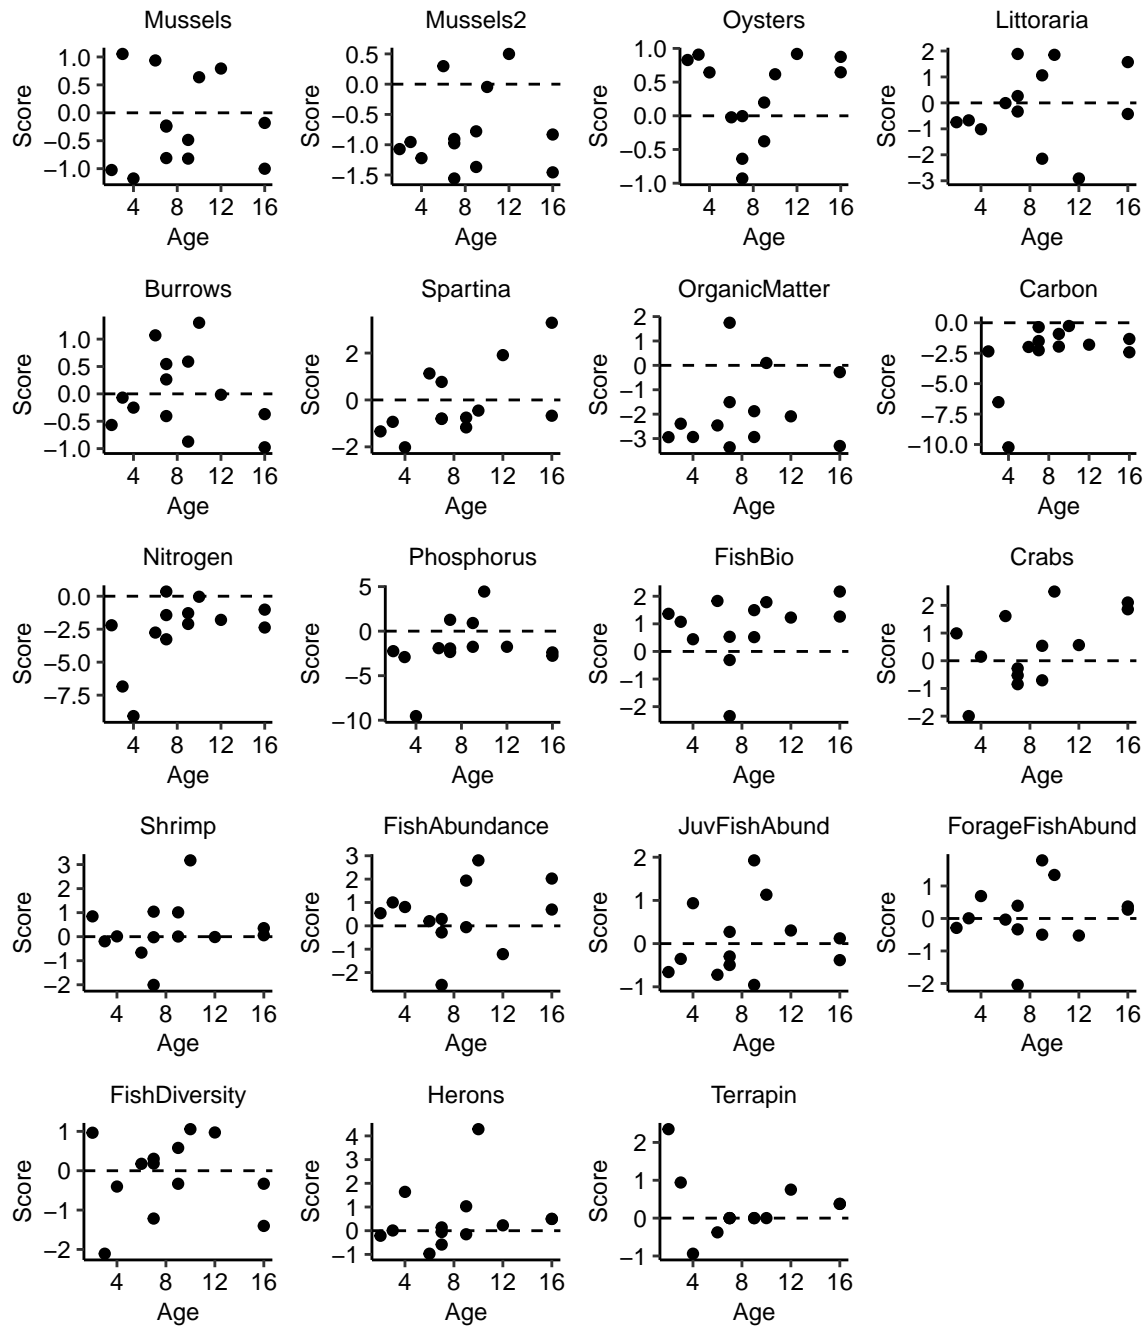

**Figure S5: Z-score vs. living shoreline age (c. 2018) for each measured metric.** Mussels2 corresponds to mussel density only in the low marsh.

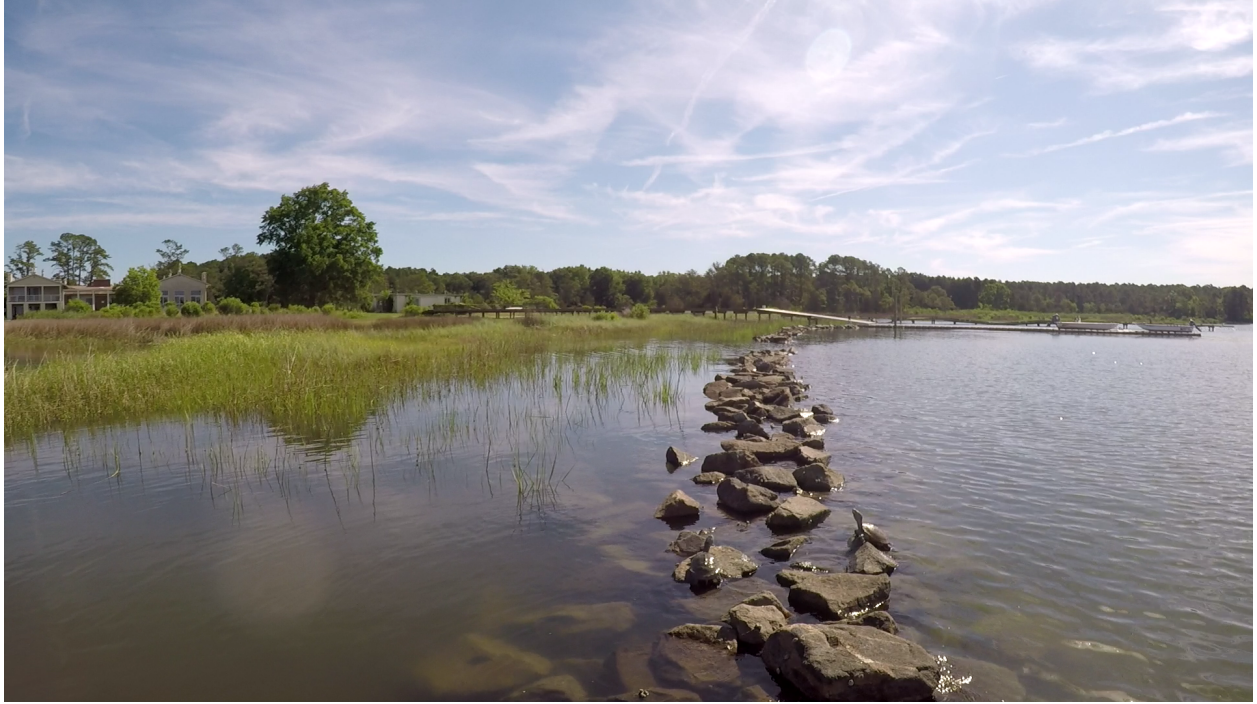

**Figure S6: Diamondback terrapins basking on a living shoreline.** Two diamondback terrapins can be seen basking on the living shoreline at one of the sites in the study.

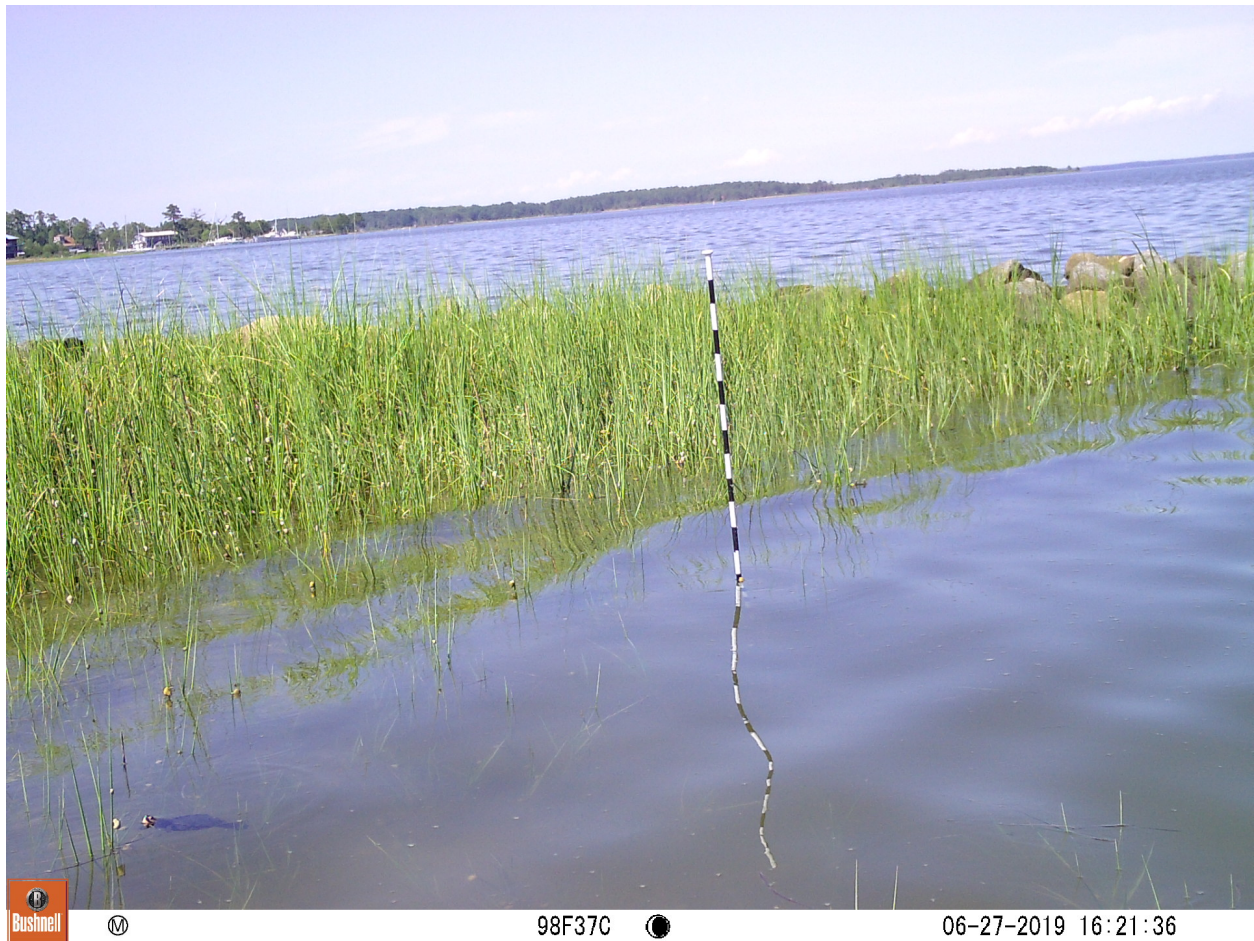

**Figure S7: Diamondback terrapin swimming behind a living shoreline sill.** A diamondback terrapin can be seen swimming behind the sill of the living shoreline.
